# Supplementary material for: Fully Human Immunoglobulin G From Transchromosomic Bovines Treats Nonhuman Primates Infected With Ebola Virus Makona Isolate
Source: Oxford University Press journal article supplement (doi:10.1093/infdis/jiy377), 2018-07-14
Supplement: jiy377_suppl_supplementary_figure1.pdf [file jiy377_suppl_supplementary_figure1.pdf]

## Supplementary Figure 1

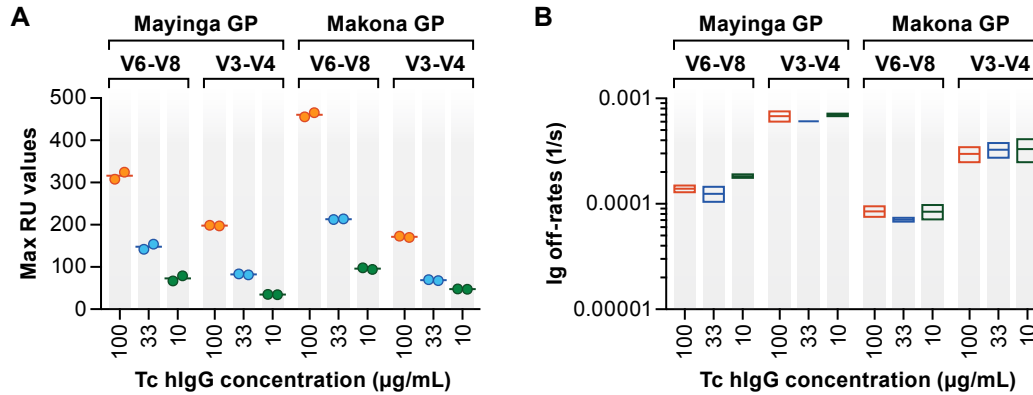

### Supplementary Figure 1: Surface plasmon resonance analysis of SAB-139/V6-V8 versus SAB-139/V3-V4 binding to EBOV-GPs.

Steady-state equilibrium surface plasmon resonance (SPR) analysis was performed on polyclonal Tc hlgG antibody binding of SAB-139/V6-V8 and SAB-139/V3-V4 to mammalian cell-derived rGP from EBOV 1976-Mayinga or 2014-Makona isolates immobilized on a HTG sensor chip. *A*, Maximum resonance unit (Max RU) values for rGP binding to SAB-139/V6-V8 and SAB-139/V3-V4. *B*, Dissociation kinetics (off-rates) of SAB-139/V6-V8 and SAB-139/V3-V4. Antibody off-rate constants that describe the fraction of antibody-antigen complexes decaying per second were determined directly from the antibody interactions with rGP using SPR in the dissociation phase. Abbreviations: EBOV, Ebola virus; rGP, recombinant glycoprotein; RU, resonance units; SPR, Surface plasmon resonance. Tc hlgG, transchromosomal human immunoglobulin G
