# Supplementary material for: Fully Human Immunoglobulin G From Transchromosomic Bovines Treats Nonhuman Primates Infected With Ebola Virus Makona Isolate
Source: Oxford University Press journal article supplement (doi:10.1093/infdis/jiy377), 2018-07-14
Supplement: jiy377_suppl_supplementary_table_1.docx [file jiy377_suppl_supplementary_table_1.docx]

| **Supplementary Table 1S. Assessment of Galactose Alpha 1-3 Galactose Concentration of Various Antibodies and Controls** | | | | | | |
| --- | --- | --- | --- | --- | --- | --- |
| OD measurements at 450 nm of test samples and controls | | | | | | |
| Blank | PBS | Tc hIgG (µg/mL) | Human IVIG (µg/mL) | ATG equine (µg/mL) | ATG rabbit (µg/mL) | Cetuximab (µg/mL) |
| 0.079 | 0.062 | 0.107 | 0.155 | 0.095 | 0.078 | 3.333 |
| 0.075 | 0.057 | 0.103 | 0.161 | 0.096 | 0.081 | 3.280 |

All antibodies were tested for galactose alpha 1-3 galactose at a concentration of 100 µg/mL. Abbreviations: ATG, anti-thymocyte globulin; OD, optical density; PBS, phosphate-buffered saline; Tc-HIgG: transchromosomic human immunoglobulin G.
