# Supplementary material for: Fully Human Immunoglobulin G From Transchromosomic Bovines Treats Nonhuman Primates Infected With Ebola Virus Makona Isolate
Source: Oxford University Press journal article supplement (doi:10.1093/infdis/jiy377), 2018-07-14
Supplement: jiy377_suppl_supplementary_table_3.docx [file jiy377_suppl_supplementary_table_3.docx]

| **Supplementary Table 3S. Anti-Ebola GP IgG ELISA Titers from Experiment 2** | | | | | | |
| --- | --- | --- | --- | --- | --- | --- |
| Group | Animal ID | GP IgG ELISA (EU/mL) by study day | | | | |
| -7 | 6/7 | 14 | 28 | 70 |
| EI: Irrelevant Tc hIgG control | 1 | <LOQ | NT | NT | NT | NT |
| 2 | <LOQ | NT | NT | NT | NT |
| EI: SAB-139/V6-V8 | 3 | <LOQ | 121,903 | 169,658 | 52,207 | 708 |
| 4 | <LOQ | 83,985 | 162,149 | 12,749 | <LOQ |
| 5 | <LOQ | 132,977 | 167,131 | 23,670 | <LOQ |
| 6 | <LOQ | 97,732 | 125,593 | 68,272 | 9,537 |
| 7 | <LOQ | 87,782 | 154,161 | 51,659 | 2,587 |
| 8 | <LOQ | 84,102 | 128,349 | 38,957 | 2,202 |
| DI: SAB-139/V6-V8 | 9 | <LOQ | 50,504 | 147,544 | 27,947 | NT |
| 10 | <LOQ | 64,993 | 161,658 | 60,431 | 7,282 |
| 11 | <LOQ | 59,737 | 121,284 | 13,138 | NT |
| 12 | <LOQ | 57,375 | 134,805 | 54,113 | 1,585 |
| 13 | <LOQ | 50,279 | 115,436 | 57,639 | 9,006 |
| 14 | <LOQ | 59,052 | 205,300 | 55,372 | 7,134 |

Antibody titers were measured using commercially available anti-EBOV GP IgG ELISA kits. Animals 9 and 11 were electively euthanized prior to d 70 postexposure due to non-EBOV-related illness. Abbreviations: DI, delayed intervention (treatment initiated d 3 postexposure); EI, early intervention (treatment initiated d 1 postexposure); EBOV, Ebola virus; EU, ELISA units; GP, glycoprotein; ID, identification number; LOQ, limit of quantification; NT, not tested; Tc hIgG, transchromosomic human Immunoglobulin G.
