# Supplementary material for: Fully Human Immunoglobulin G From Transchromosomic Bovines Treats Nonhuman Primates Infected With Ebola Virus Makona Isolate
Source: Oxford University Press journal article supplement (doi:10.1093/infdis/jiy377), 2018-07-14
Supplement: jiy377_suppl_supplementary_table_5.docx [file jiy377_suppl_supplementary_table_5.docx]

| **Supplementary Table 5S. Anti-EBOV IgG ELISA Titers from Experiment 3** | | | | |
| --- | --- | --- | --- | --- |
| Group | Animal ID | Necropsy (day) | Baseline GP IgG (EU/mL) | GP IgG at necropsy (EU/mL) |
| Saline control | 1 | 7 | <LOQ | <LOQ |
| 10 | 7 | <LOQ | <LOQ |
| 4 | 7 | <LOQ | <LOQ |
| 3 | 8 | <LOQ | <LOQ |
| LI: Irrelevant Tc hIgG control | 12 | 8 | <LOQ | <LOQ |
| 9 | 7 | <LOQ | <LOQ |
| LI: SAB-139/V6-V8 | 5 | 7 | <LOQ | 2,597 |
| 7 | 9 | <LOQ | 1,688 |
| 11 | 7 | <LOQ | 3,628 |
| 8 | 6 | <LOQ | 3,013 |
| 2 | 7 | <LOQ | 2,286 |
| 6 | 9 | <LOQ | 2,942 |

Abbreviations: EU, ELISA units; GP, glycoprotein; ID, identification number; LI, late intervention (treatment initiated on d 5 postexposure); LOQ, Limit of quantitation; Tc hIgG, transchromosomic human Immunoglobulin G.
