# Supplementary material for: Fully Human Immunoglobulin G From Transchromosomic Bovines Treats Nonhuman Primates Infected With Ebola Virus Makona Isolate
Source: Oxford University Press journal article supplement (doi:10.1093/infdis/jiy377), 2018-07-14
Supplement: jiy377_suppl_supplementary_table_10.docx [file jiy377_suppl_supplementary_table_10.docx]

| **Supplementary Table 10S. Filovirus Genomes in Probe Set** | |
| --- | --- |
| GenBank Accession | Description |
| NC_016144 | Lloviu cuevavirus |
| NC_014373 | Bundibugyo ebolavirus |
| NC_002549 | Zaire ebolavirus |
| NC_004161 | Reston ebolavirus |
| NC_006432 | Sudan ebolavirus |
| NC_014372 | Taï Forest ebolavirus |
| NC_001608 | Marburg marburgvirus Elgon-Musoke isolate |
| NC_024781 | Marburg marburgvirus Kitum Cave isolate |
